# Supplementary material
Source: HighWire-hosted journal article supplement (https://bmjopensem.bmj.com/content/4/1/e000333)
Supplement: inline-supplementary-material-1 [file inline-supplementary-material-1.pdf]

**SUPPLEMENTARY MATERIALS**

| <b>WEEKS AS TIME SCALE</b> |               |      |           |          |               |       |           |          |               |       |           |          |                |        |           |          |
|----------------------------|---------------|------|-----------|----------|---------------|-------|-----------|----------|---------------|-------|-----------|----------|----------------|--------|-----------|----------|
|                            | <b>WEEK 2</b> |      |           |          | <b>WEEK 4</b> |       |           |          | <b>WEEK 8</b> |       |           |          | <b>WEEK 16</b> |        |           |          |
| <b>ANALYSIS</b>            | Ref           | RD†  | 95%CI     | <i>p</i> | Ref           | RD†   | 95%CI     | <i>p</i> | Ref           | RD†   | 95%CI     | <i>p</i> | Ref            | RD†    | 95%CI     | <i>p</i> |
| <b>ITT</b>                 | 4.6%          | 1.5% | -2.8;5.7  | 0.50     | 8.2%          | 0.9%  | -4.5;6.3  | 0.74     | 13.2%         | -2.3% | -8.8;4.0  | 0.47     | 28.0%          | -7.0%  | -18.4;4.5 | 0.23     |
| <b>PP</b>                  | 0.8%          | 1.0% | -1.9;3.9  | 0.50     | 5.1%          | -1.5% | -6.9;3.8  | 0.58     | 12.9%         | -6.6% | -14.4;1.3 | 0.10     | 32.4%          | -12.9% | -28.0;2.2 | 0.09     |
| <b>IV</b>                  | 4.6%          | 2.9% | -5.7;11.6 | 0.51     | 8.2%          | 1.8%  | -9.1;12.8 | 0.74     | 13.2%         | -4.7% | -17.5;8.1 | 0.47     | 28.0%          | -14.0% | -36.9;8.9 | 0.23     |

Table 3. Risk difference between Sch-I and Sch-V using weeks as time scale. Reference group was Sch-V. Results are presented as Reference risk (Ref), Risk Difference (RD), 95% confidence interval, level of significance (*p*). Abbreviations: ITT (intention to treat), PP (per protocol), IV (instrumental variable analysis). †Values are absolute percentage points.

| <b>DAYS AS TIME SCALE</b> |               |      |           |          |               |      |           |          |               |       |           |          |                |       |           |          |
|---------------------------|---------------|------|-----------|----------|---------------|------|-----------|----------|---------------|-------|-----------|----------|----------------|-------|-----------|----------|
|                           | <b>DAY 14</b> |      |           |          | <b>DAY 28</b> |      |           |          | <b>DAY 56</b> |       |           |          | <b>DAY 112</b> |       |           |          |
| <b>ANALYSIS</b>           | Ref           | RD†  | 95%CI     | <i>p</i> | Ref           | RD†  | 95%CI     | <i>p</i> | Ref           | RD†   | 95%CI     | <i>p</i> | Ref            | RD†   | 95%CI     | <i>p</i> |
| <b>ITT</b>                | 3.7%          | 0.9% | -2.9;4.7  | 0.63     | 6.2%          | 0.9% | -3.9;5.7  | 0.72     | 11.6%         | -1.9% | -7.9;4.2  | 0.55     | 23.3%          | -4.4% | -13.1;4.3 | 0.32     |
| <b>PP</b>                 | 0.8%          | 0.1% | -2.3;2.5  | 0.94     | 2.5%          | 0.2% | -4.0;4.4  | 0.93     | 10.3%         | -5.9  | -12.8;1.0 | 0.09     | 25.9%          | -8.2% | -19.4;3.0 | 0.15     |
| <b>IV</b>                 | 3.7%          | 1.9% | -5.8;-9.5 | 0.63     | 6.2%          | 1.8% | -7.9;11.4 | 0.72     | 11.6%         | -3.8% | -15.8;8.3 | 0.54     | 23.3%          | -8.9% | -26.3;8.5 | 0.32     |

Table 4. Risk difference between Sch-I and Sch-V using days as time scale. Reference group was Sch-V. Results are presented as Reference risk (Ref), Risk Difference (RD), 95% confidence interval, level of significance (*p*). Abbreviations: ITT (intention to treat), PP (per protocol), IV (instrumental variable analysis). †Values are absolute difference in risks expressed as percentage points.



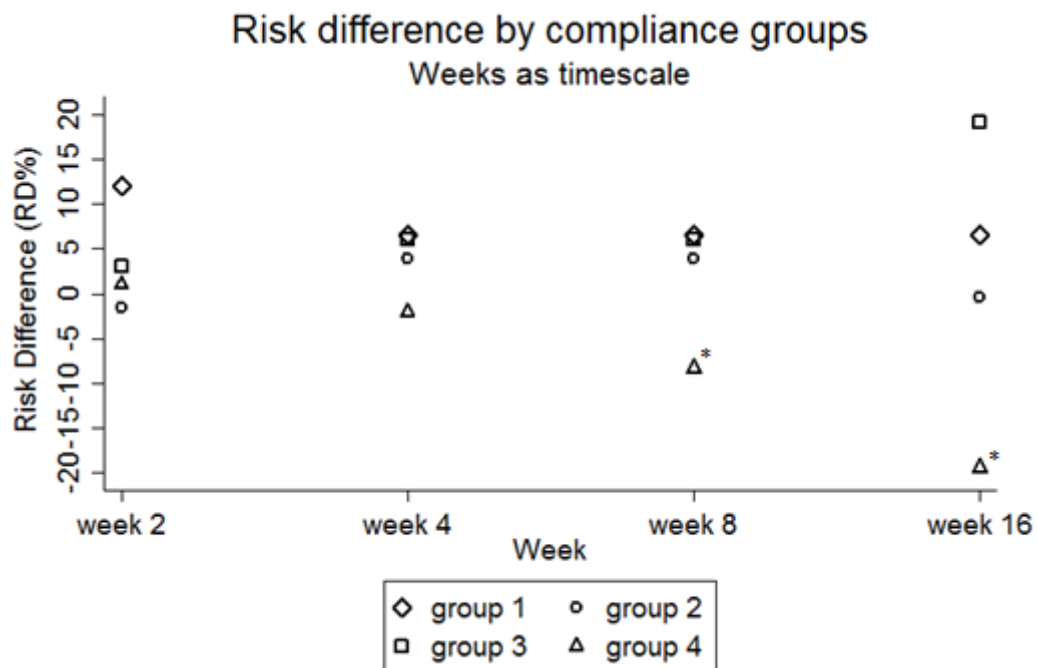

Figure 4. Risk difference between Schedule Intensity and Schedule Volume, using weeks as time scale and analyzed according to compliance groups. Compliance is quantified as percentage by calculating the total individual running frequency during the intervention period, divided by the total scheduled running frequency during the intervention period. Group 1: <50% compliance, Group 2: 50%-75% compliance, Group 3: >75%-85% compliance, Group 4: >85% compliance. The reference group is Schedule Volume and estimates are absolute percentage points. \*  $p < 0.05$ .
